# Supplementary material for: A Langmuir-Blodgett Study of the Interaction between Amphotericin B and Lipids of Histoplasma capsulatum
Source: MDPI journal article supplement (doi:10.3390/membranes12050483), 2022-04-29
Supplement: s1 [file s1]

Supplementary material

# A Langmuir-Blodgett Study of the Interaction between Amphotericin B and Lipids of *Histoplasma capsulatum*

Pedronel Araque-Marín <sup>1</sup>, Andrea Naranjo Díaz <sup>2</sup>, Luisa Fernanda Gómez Londoño <sup>3</sup>,  
María del Pilar Jiménez Alzate <sup>3</sup>, Francesco Castelli <sup>4</sup>, Maria Grazia Sarpietro <sup>4,\*</sup>, Cristiano Giordani <sup>5,6</sup>  
and Carlos Alberto Peláez Jaramillo <sup>2</sup>

<sup>1</sup> School of Life Sciences, Universidad Escuela de Ingeniería de Antioquia (EIA), Envigado 055428, Colombia; pedronel.araque@eia.edu.co

<sup>2</sup> Grupo Interdisciplinario de Estudios Moleculares, Institute of Chemistry, Faculty of Exact and Natural Sciences, Universidad de Antioquia, Medellín 050010, Colombia; andrea.naranjo@udea.edu.co (A.N.D.); carlos.pelaez@udea.edu.co (C.A.P.J.)

<sup>3</sup> Grupo Micología Médica, Department of Microbiology and Parasitology, Faculty of Medicine, Universidad de Antioquia, Calle 70 No. 52-21, Medellín 050010, Colombia; luisa.gomezl@udea.edu.co (L.F.G.L.); delpilar.jimenez@udea.edu.co (M.d.P.J.A.)

<sup>4</sup> Department of Drug and Health Sciences, Università degli Studi di Catania, Viale A. Doria 6, 95125 Catania, Italy; fcastelli@unict.it

<sup>5</sup> Institute of Physics, Faculty of Exact and Natural Sciences, Universidad de Antioquia, Calle 70 No. 52-21, Medellín 050010, Colombia; cristiano.giordani@udea.edu.co

<sup>6</sup> Grupo Productos Naturales Marinos, Faculty of Pharmaceutical and Food Sciences, Universidad de Antioquia, Calle 70 No. 52-21, Medellín 050010, Colombia

\* Correspondence: mg.sarpietro@unict.it

**Citation:** Araque-Marín, P.; Naranjo Díaz, A.; Gómez Londoño, L.F.; Jiménez Alzate, M.d.P.; Castelli, F.; Sarpietro, M.G.; Giordani, C.; Peláez Jaramillo C.A. A Langmuir-Blodgett Study of the Interaction between Amphotericin B and Lipids of *Histoplasma capsulatum*. *Membranes* **2022**, *12*, 483. <https://doi.org/10.3390/membranes12050483>

Academic Editor: Yukihiro Okamoto

Received: 7 April 2022

Accepted: 23 April 2022

Published: 29 April 2022

**Publisher's Note:** MDPI stays neutral with regard to jurisdictional claims in published maps and institutional affiliations.

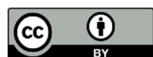

**Copyright:** © 2022 by the authors. Licensee MDPI, Basel, Switzerland. This article is an open access article distributed under the terms and conditions of the Creative Commons Attribution (CC BY) license (<https://creativecommons.org/licenses/by/4.0/>).

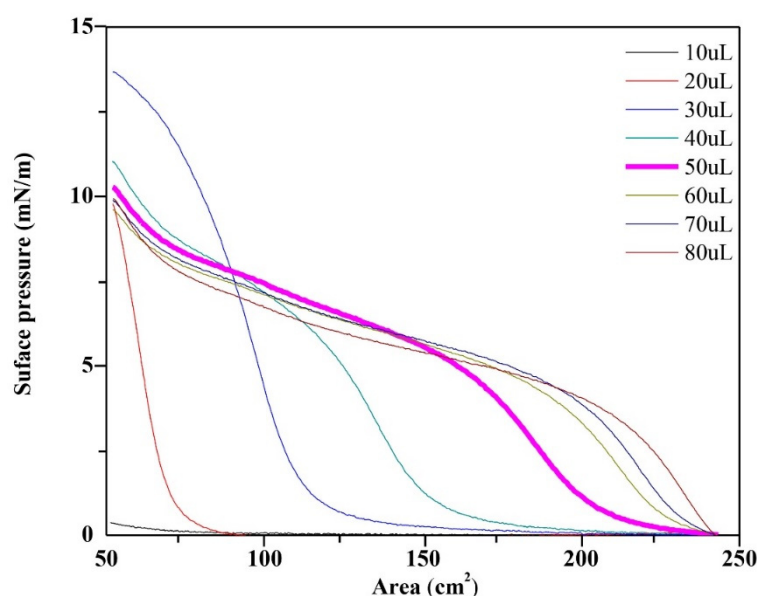

**Figure S1.** Surface pressure-area isotherms from the Teflon trough for the monolayers of AmB in incremental volume. Concentration is 0.447 g/L.

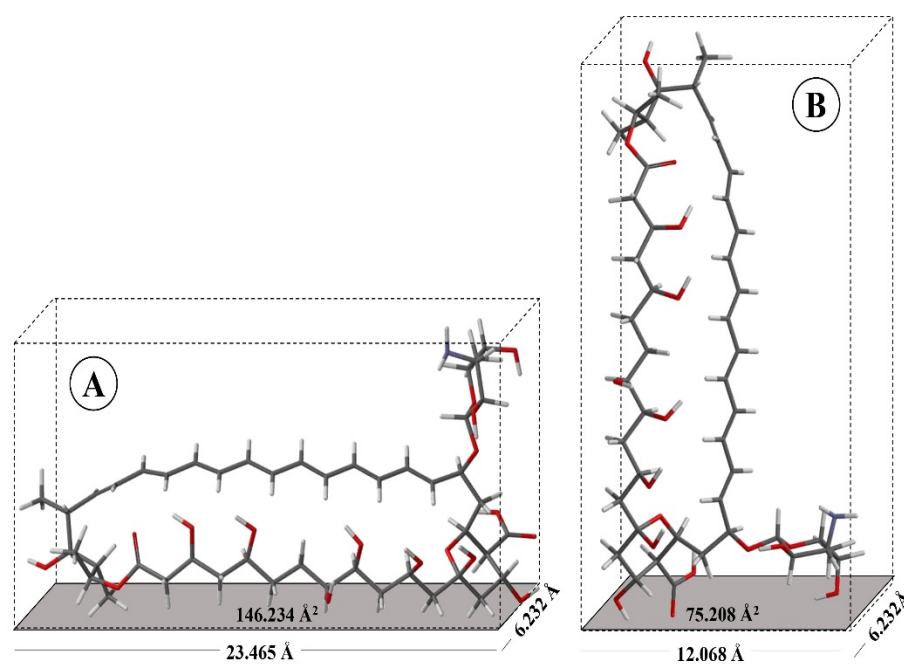

**Figure S2.** Reorientation model of the AmB molecule: (A) horizontal position ( $A_h$ ); (B) vertical position ( $A_v$ ). Energy Minimization to a value of -3271.74 kJ/mol.

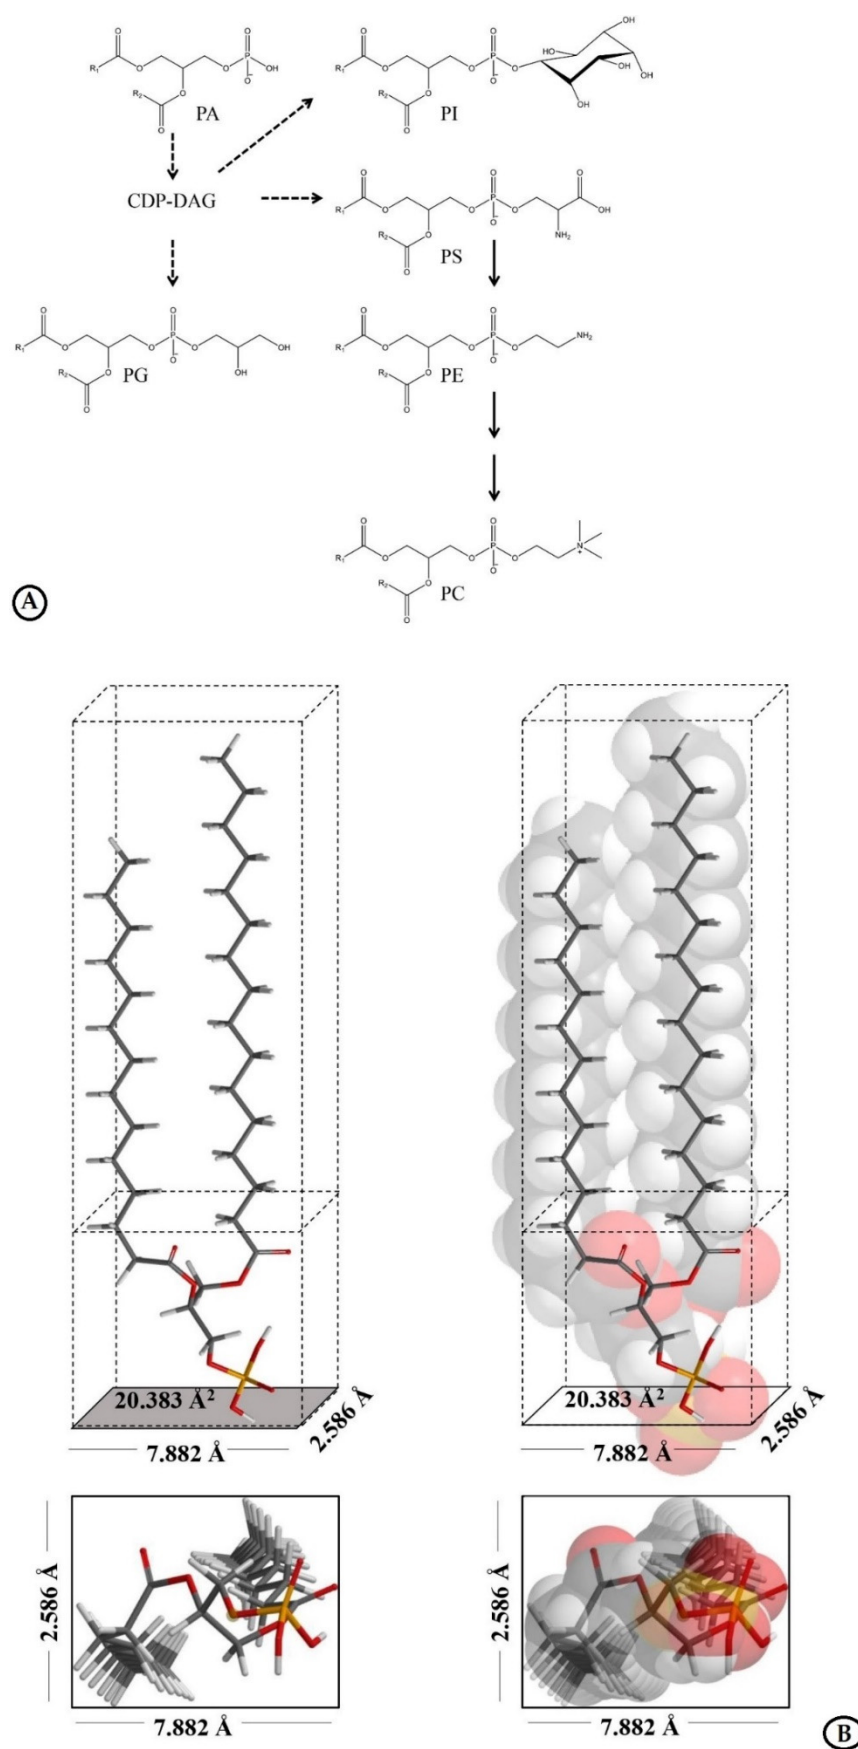

**Figure S3.** (A) Phosphatidic acid (PA) as the forerunner of the other phospholipids. (B) Phosphatidic acid in horizontal position ( $A_h$ ) with its space-filling model and aerial views.
